# Supplementary material for: Free Radical Scavenging Potency of Dihydroxybenzoic Acids
Source: Hindawi journal article supplement (doi:10.1155/2017/5936239), 2017-01-01
Supplement: f1 [file 5936239.f1.pdf]

## **Supplementary data**

**For**

### **Free radical scavenging potency of dihydroxybenzoic acids**

**Dejan Milenković<sup>1\*</sup>, Jelena Đorović<sup>1</sup>, Svetlana Jeremić<sup>2</sup>, Jasmina M. Dimitrić  
Marković<sup>3</sup>, Edina H. Avdović<sup>2</sup>, Zoran Marković<sup>1,2</sup>**

<sup>1</sup>Bioengineering Research and Development Center, 34000 Kragujevac,

Republic of Serbia

<sup>2</sup>Department of Chemical-Technological Sciences, State University of Novi Pazar,

Vuka Karadžića bb, 36300 Novi Pazar, Republic of Serbia

<sup>3</sup>Faculty of Physical Chemistry, University of Belgrade, Studentski trg 12-16, 11000

Belgrade, Republic of Serbia

\* Corresponding author

Tel.: +381 34500088;

Fax: ++381 34500089.

E-mail address: deki82@kg.ac.rs (D. Milenković)

**FIGURES S1 - S6:** The structures of different rotamers of investigated DHBAs

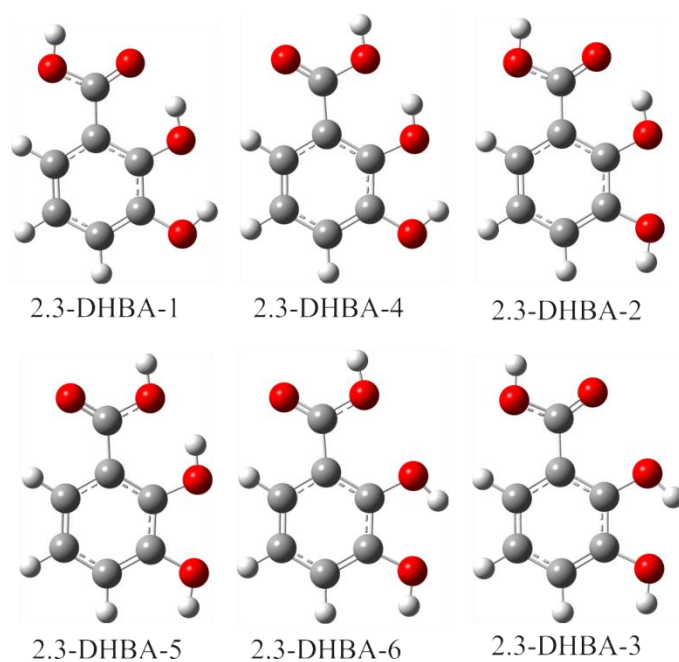

**Figure S1**

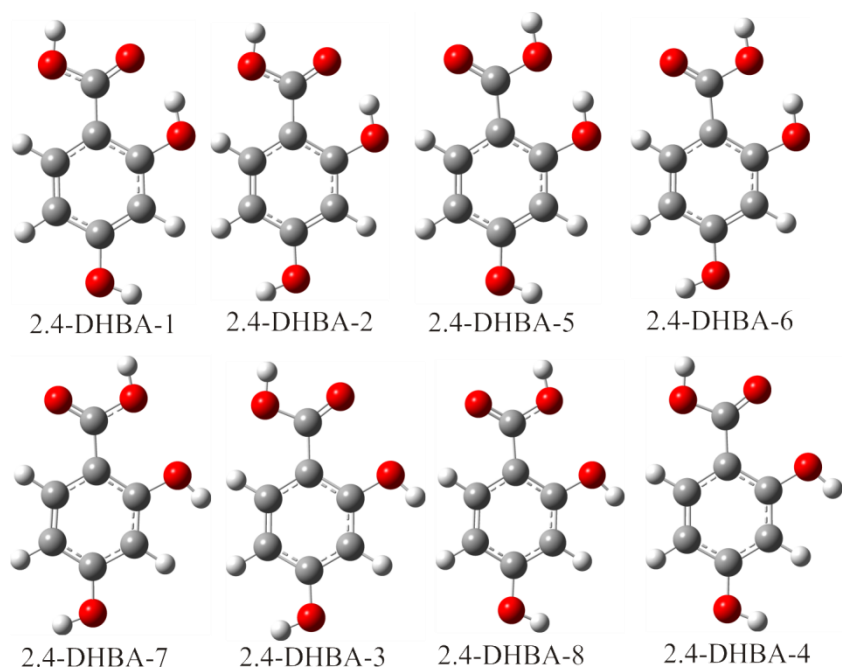

**Figure S2**

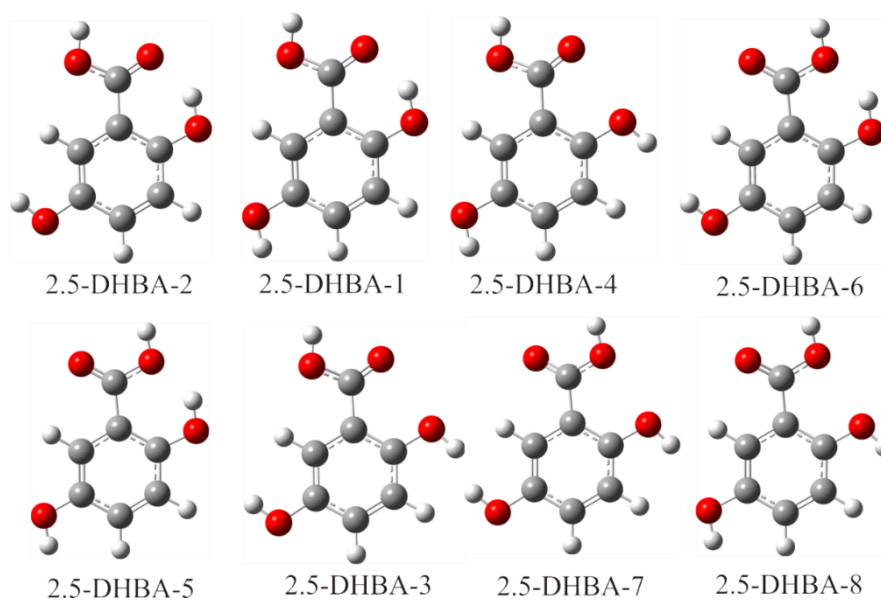

**Figure S3**

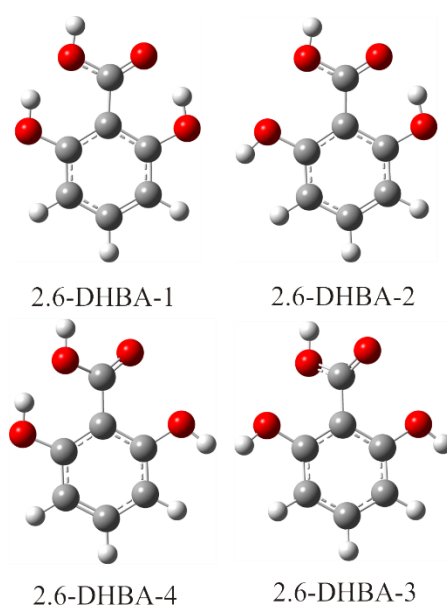

**Figure S4**

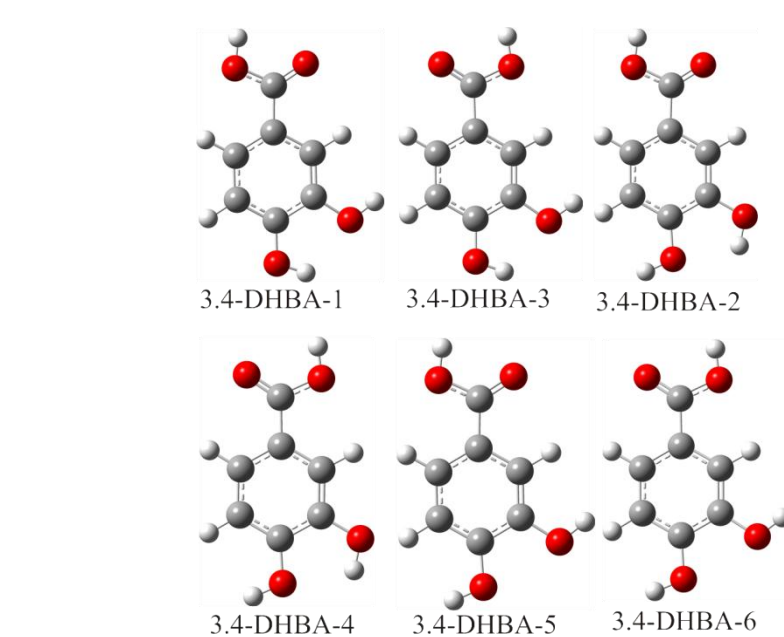

**Figure S5**

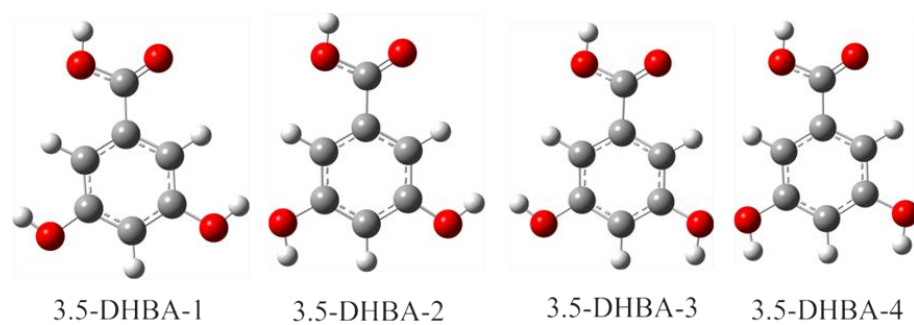

**Figure S6**

**TABLES S1 - S6 :** Relative energies kJ/mol ( $E$  = total energy,  $H$  = enthalpy, and  $G$  = free energy) for the examined DHBAs rotamers in different solvents. Calculations were performed at the M05-2X/6-311++G(d,p) level of theory. The abbreviations in tables  $PE$ ,  $W$  and  $B$  represents following solvents: penthylethanoate, water and benzene, respectively.

**Table S1**

| <i>Rot</i>      | $\Delta E^{SMD}$ |          |          | $\Delta H^{SMD}$ |          |          | $\Delta G^{SMD}$ |          |          |
|-----------------|------------------|----------|----------|------------------|----------|----------|------------------|----------|----------|
|                 | <i>PE</i>        | <i>W</i> | <i>B</i> | <i>PE</i>        | <i>W</i> | <i>B</i> | <i>PE</i>        | <i>W</i> | <i>B</i> |
| <i>2.3-DHBA</i> |                  |          |          |                  |          |          |                  |          |          |
| 1               | 0.0              | 0.0      | 0.0      | 0.0              | 0.0      | 0.0      | 0.0              | 0.0      | 0.0      |
| 2               | 13.2             | 3.2      | 16.6     | 13.3             | 3.2      | 16.7     | 13.1             | 1.8      | 16.4     |
| 3               | 33.9             | 17.8     | 38.5     | 34.9             | 17.9     | 39.6     | 31.4             | 17.8     | 35.9     |
| 4               | 11.3             | 6.7      | 12.0     | 11.9             | 7.3      | 12.7     | 9.9              | 4.8      | 9.5      |
| 5               | 25.1             | 11.0     | 28.6     | 25.6             | 11.2     | 29.4     | 24.4             | 9.5      | 26.5     |
| 6               | 33.3             | 18.4     | 36.9     | 34.2             | 18.8     | 38.0     | 32.1             | 17.8     | 35.3     |

**Table S2**

| <i>Rot</i>      | $\Delta E^{SMD}$ |          |          | $\Delta H^{SMD}$ |          |          | $\Delta G^{SMD}$ |          |          |
|-----------------|------------------|----------|----------|------------------|----------|----------|------------------|----------|----------|
|                 | <i>PE</i>        | <i>W</i> | <i>B</i> | <i>PE</i>        | <i>W</i> | <i>B</i> | <i>PE</i>        | <i>W</i> | <i>B</i> |
| <i>2.4-DHBA</i> |                  |          |          |                  |          |          |                  |          |          |
| 1               | 0.0              | 0.3      | 0.0      | 0.0              | 0.2      | 0.0      | 0.0              | 0.4      | 0.0      |
| 2               | 0.7              | 0.0      | 1.1      | 0.7              | 0.0      | 1.1      | 0.7              | 0.0      | 1.1      |
| 3               | 35.4             | 18.4     | 38.8     | 36.4             | 19.1     | 40.1     | 32.9             | 16.3     | 34.3     |
| 4               | 36.5             | 18.2     | 40.8     | 37.6             | 19.2     | 42.0     | 32.2             | 13.8     | 37.2     |
| 5               | 12.1             | 8.1      | 12.7     | 12.6             | 8.6      | 13.2     | 11.3             | 7.0      | 11.7     |
| 6               | 12.7             | 8.1      | 13.5     | 13.1             | 8.5      | 13.9     | 12.0             | 7.1      | 12.6     |
| 7               | 34.4             | 20.2     | 37.4     | 35.4             | 20.7     | 38.5     | 32.9             | 18.7     | 35.6     |
| 8               | 35.5             | 20.4     | 39.2     | 36.6             | 20.9     | 40.6     | 33.8             | 19.1     | 37.2     |

**Table S3**

| <i>Rot</i> | $\Delta E^{SMD}$ |          |          | $\Delta H^{SMD}$ |          |          | $\Delta G^{SMD}$ |          |          |
|------------|------------------|----------|----------|------------------|----------|----------|------------------|----------|----------|
|            | <i>PE</i>        | <i>W</i> | <i>B</i> | <i>PE</i>        | <i>W</i> | <i>B</i> | <i>PE</i>        | <i>W</i> | <i>B</i> |
| 2.5-DHBA   |                  |          |          |                  |          |          |                  |          |          |
| 1          | 0.9              | 0.3      | 4.7      | 0.9              | 0.3      | 3.9      | 1.0              | 0.4      | 6.2      |
| 2          | 0.0              | 0.0      | 2.5      | 0.0              | 0.0      | 1.8      | 0.0              | 0.0      | 3.7      |
| 3          | 32.6             | 17.2     | 0.0      | 31.4             | 17.9     | 0.0      | 34.8             | 16.1     | 0.0      |
| 4          | 4.5              | 17.4     | 41.9     | 5.3              | 18.2     | 41.9     | 3.5              | 16.3     | 40.9     |
| 5          | 12.9             | 8.6      | 16.5     | 13.4             | 9.0      | 16.2     | 11.8             | 8.0      | 16.6     |
| 6          | 11.9             | 8.7      | 14.7     | 12.1             | 8.8      | 14.1     | 11.5             | 8.7      | 15.4     |
| 7          | 32.9             | 18.9     | 37.4     | 33.7             | 19.6     | 37.6     | 31.0             | 17.1     | 37.2     |
| 8          | 34.7             | 19.1     | 40.9     | 35.5             | 19.9     | 41.1     | 32.0             | 17.3     | 39.8     |

**Table S4:**

| <i>Rot</i> | $\Delta E^{SMD}$ |          |          | $\Delta H^{SMD}$ |          |          | $\Delta G^{SMD}$ |          |          |
|------------|------------------|----------|----------|------------------|----------|----------|------------------|----------|----------|
|            | <i>PE</i>        | <i>W</i> | <i>B</i> | <i>PE</i>        | <i>W</i> | <i>B</i> | <i>PE</i>        | <i>W</i> | <i>B</i> |
| 2.6-DHBA   |                  |          |          |                  |          |          |                  |          |          |
| 1          | 0.0              | 0.0      | 0.0      | 0.0              | 0.0      | 0.0      | 0.0              | 0.0      | 0.0      |
| 2          | 16.9             | 9.7      | 18.7     | 17.0             | 9.6      | 18.9     | 16.7             | 9.9      | 18.4     |
| 3          | 39.2             | 23.3     | 45.7     | 42.1             | 24.4     | 48.9     | 34.1             | 22.5     | 39.4     |
| 4          | 32.1             | 19.2     | 35.5     | 32.8             | 19.3     | 36.1     | 30.0             | 19.3     | 34.1     |

**Table S5:**

| <i>Rot</i> | $\Delta E^{SMD}$ |          |          | $\Delta H^{SMD}$ |          |          | $\Delta G^{SMD}$ |          |          |
|------------|------------------|----------|----------|------------------|----------|----------|------------------|----------|----------|
|            | <i>PE</i>        | <i>W</i> | <i>B</i> | <i>PE</i>        | <i>W</i> | <i>B</i> | <i>PE</i>        | <i>W</i> | <i>B</i> |
| 3.4-DHBA   |                  |          |          |                  |          |          |                  |          |          |
| 1          | 0.0              | 0.0      | 0.0      | 0.0              | 0.0      | 0.0      | 0.7              | 1.1      | 0.0      |
| 2          | 1.1              | 0.8      | 1.8      | 1.5              | 0.8      | 2.4      | 1.1              | 2.0      | 1.0      |
| 3          | 1.0              | 0.2      | 1.3      | 1.1              | 0.3      | 1.3      | 0.7              | 0.2      | 0.6      |
| 4          | 1.1              | 0.3      | 1.7      | 1.7              | 0.6      | 2.4      | 0.0              | 0.0      | 0.2      |
| 5          | 11.3             | 3.3      | 13.8     | 11.5             | 3.1      | 14.1     | 11.8             | 4.7      | 13.5     |
| 6          | 11.4             | 2.7      | 14.0     | 11.9             | 2.9      | 14.6     | 10.6             | 2.6      | 12.7     |

**Table S6**

| <i>Rot</i>      | $\Delta E^{\text{SMD}}$ |          |          | $\Delta H^{\text{SMD}}$ |          |          | $\Delta G^{\text{SMD}}$ |          |          |
|-----------------|-------------------------|----------|----------|-------------------------|----------|----------|-------------------------|----------|----------|
|                 | <i>PE</i>               | <i>W</i> | <i>B</i> | <i>PE</i>               | <i>W</i> | <i>B</i> | <i>PE</i>               | <i>W</i> | <i>B</i> |
| <i>2,5-DHBA</i> |                         |          |          |                         |          |          |                         |          |          |
| 1               | 0.0                     | 0.1      | 0.0      | 0.0                     | 0.0      | 0.0      | 0.0                     | 0.4      | 0.0      |
| 2               | 0.8                     | 1.5      | 1.1      | 0.6                     | 1.0      | 0.8      | 1.0                     | 2.2      | 1.4      |
| 3               | 1.4                     | 0.0      | 2.0      | 1.2                     | 0.1      | 1.8      | 1.7                     | 0.0      | 2.3      |
| 4               | 3.4                     | 1.7      | 5.0      | 3.1                     | 1.4      | 4.7      | 3.6                     | 2.1      | 5.3      |

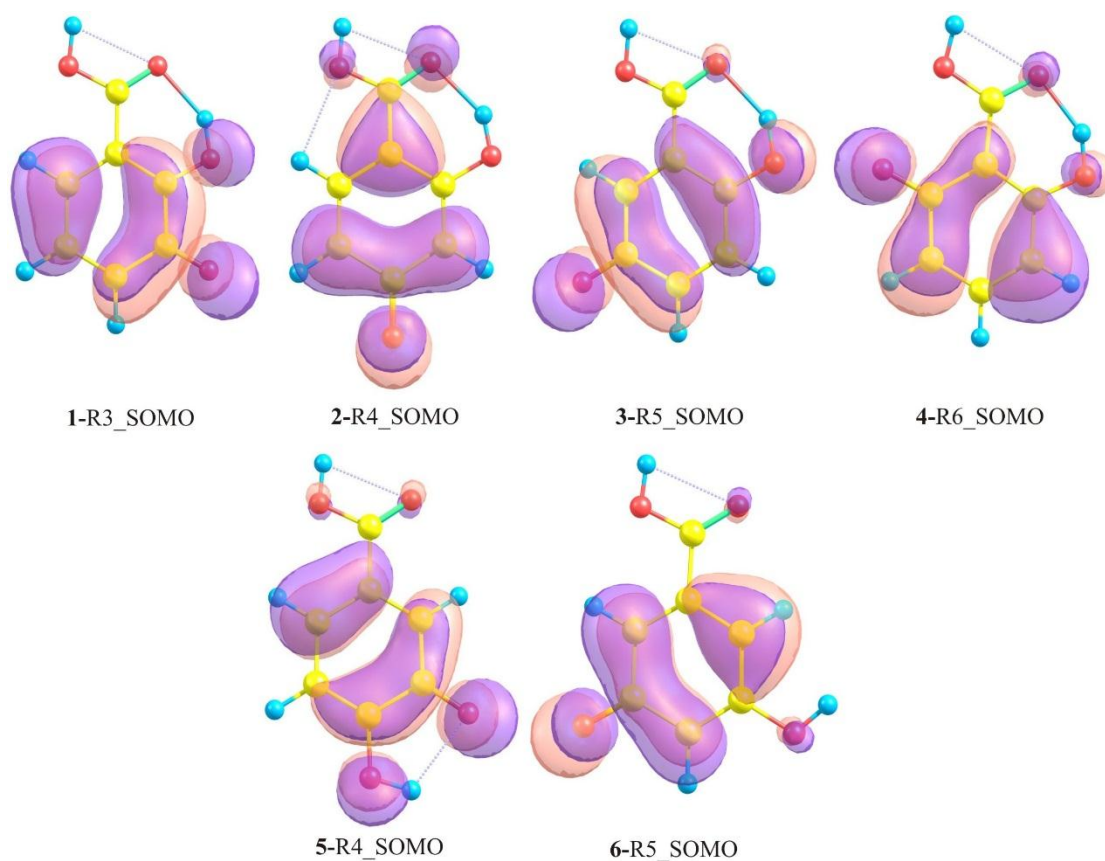

**FIGURE S7** SOMOs of the most stable radicals formed from the investigated DHBA in water.
